# Supplementary material for: Ecological and Human Health Risk Assessment of Heavy Metals in Cultured Shrimp and Aquaculture Sludge
Source: MDPI journal article supplement (doi:10.3390/toxics10040175), 2022-04-02
Supplement: s1 [file s1]

# Supplementary Materials: Ecological and Human Health Risk Assessment of Heavy Metals in Cultured Shrimp and Aquaculture Sludge

Salma Sultana, M. Belal Hossain, Tasrina R. Choudhury, Jimmy Yu, Md. Sohel Rana, Md Abu Noman, M. Mozammel Hosen, Bilal Ahamad Paray and Takaomi Arai

**Table S1.** Spectral lines used in emission measurements and the instrumental detection limit for the elements measured by using AAS.

| Elements | Wavelengths (nm) | Instrumental detection limit (mg/l) |
|----------|------------------|-------------------------------------|
| Hg       | 253.7            |                                     |
| As       | 193.7            |                                     |
| Pb       | 217.0            | 0.013                               |
| Cr       | 357.9            | 0.0054                              |
| Cd       | 228.8            | 0.0028                              |
| Mn       | 279.5            | 0.0016                              |
| Cu       | 324.8            | 0.004                               |
| Zn       | 213.9            | 0.0033                              |

**Table S2.** Index classification of sediment quality (Muller, 1981).

| I-geo values<br>Muller (1981) | Sediment quality                  |
|-------------------------------|-----------------------------------|
| <0                            | practically unpolluted            |
| 0-1                           | unpolluted to moderately polluted |
| 1-2                           | moderately polluted               |
| 2-3                           | moderately to strongly polluted   |
| 3-4                           | strongly polluted                 |
| 4-5                           | strongly to extremely polluted    |
| > 5                           | extremely polluted                |
| CF values<br>Hakanson (1980)  |                                   |
| CF <1                         | refers to low contamination       |
| 1 ≤ CF <3                     | means moderate contamination      |
| 3 ≤ CF <6                     | considerable                      |
| CF ≥6                         | indicates very high contamination |
